# Supplementary material
Source: PubMed Central journal article supplement (PMC6125224)
Supplement: NIHMS979328-supplement-1.pdf [file NIHMS979328-supplement-1.pdf]

| Cohort                      | Number | Age | Sex | Cancer Site  | TNM Stage | Size (mm) | Prior Chemo | Prior Radiation | Pan-800 dose (mg) | Procedure                                          |
|-----------------------------|--------|-----|-----|--------------|-----------|-----------|-------------|-----------------|-------------------|----------------------------------------------------|
| Cohort 1<br>(0.06 mg/kg)    | 1      | 49  | M   | Oral Cavity  | rT0N3M0   | 40        | Y           | N               | 5.64              | Marginal mandibulectomy with ND                    |
|                             | 2      | 85  | M   | Cutaneous    | rT0N2M0   | 40        | N           | Y               | 4.5               | Modified radical level II-V                        |
|                             | 3      | 38  | F   | Nasal Cavity | T4N0M0    |           | N           | N               | 3.888             | Maxillectomy                                       |
| Cohort 2A<br>(LD+0.5 mg/kg) | 4      | 56  | M   | Oral Cavity  | rT1N0M0   | 6         | N           | Y (Local)       | 28.15             | Lip resection with ND and FF                       |
|                             | 5      | 71  | M   | Oral Cavity  | rT2N2M0   | 35        | N           | N               | 45.55             | Partial glossectomy with ND                        |
|                             | 6      | 52  | M   | Oral Cavity  | T2N2M0    | 30        | N           | N               | 40.25             | Glossectomy with ND                                |
|                             | 7      | 71  | M   | Nasal Cavity | rT3N0M0   | 52        | N           | N               | 46.9              | Maxillectomy with FF                               |
|                             | 8      | 62  | M   | Oral Cavity  | T2N0M0    | 24        | N           | N               | 35.3              | Mouth Vestibule Lesion with ND and FF              |
| Cohort 2B<br>(LD+1.0 mg/kg) | 9      | 78  | M   | Oral Cavity  | T2N0M0    | 30        | N           | N               | 53.2              | Hemiglossectomy with ND and FF                     |
|                             | 10     | 32  | M   | Pharynx      | rT2N0M0   | 30        | Y           | Y               | 67.5              | Laryngectomy with ND and FF                        |
|                             | 11     | 62  | M   | Oral Cavity  | T2N0M0    | 30        | N           | N               | 62.7              | Mandibulectomy with ND and FF                      |
|                             | 12     | 49  | M   | Oral Cavity  | T4N0M0    | 55        | N           | N               | 68.6              | Glossectomy with ND and FF                         |
|                             | 13     | 68  | F   | Oral Cavity  | T3N2M0    | 45        | N           | N               | 61.5              | Glossectomy with ND and FF                         |
|                             | 14     | 56  | M   | Oral Cavity  | T4N1M0    | 55        | N           | N               | 75.4              | Glossectomy with ND and FF                         |
|                             | 15     | 51  | M   | Oral Cavity  | T4N2M0    | 40        | N           | N               | 94.8              | Mandibulectomy with ND and FF                      |
| Cohort 3<br>(50 mg)         | 16     | 82  | F   | Oral Cavity  | rT3N0M0   | 25        | N           | Y               | 50                | Maxillectomy with FF                               |
|                             | 17     | 46  | M   | Oral Cavity  | T1N0M0    | 10        | N           | N               | 50                | Hemiglossectomy with ND and FF                     |
|                             | 18     | 69  | F   | Oral Cavity  | T1N0M0    | 18        | N           | N               | 50                | Buccal excision ND with FF                         |
|                             | 19     | 52  | F   | Oral Cavity  | T3N1M0    | 43        | N           | N               | 50                | Glossectomy with ND and FF                         |
|                             | 20     | 67  | F   | Oral Cavity  | T2N0M0    | 28        | N           | N               | 50                | Tonsillar pillars radical resection with ND and FF |
|                             | 21     | 73  | M   | Oral Cavity  | T3N2M0    | 55        | N           | N               | 50                | Glossectomy with ND and FF                         |

n = 21; LD = Loading Dose; ND = Neck Dissection; FF = Free Flap

**Supplementary Figure 1:** Patient and tumor characteristics.

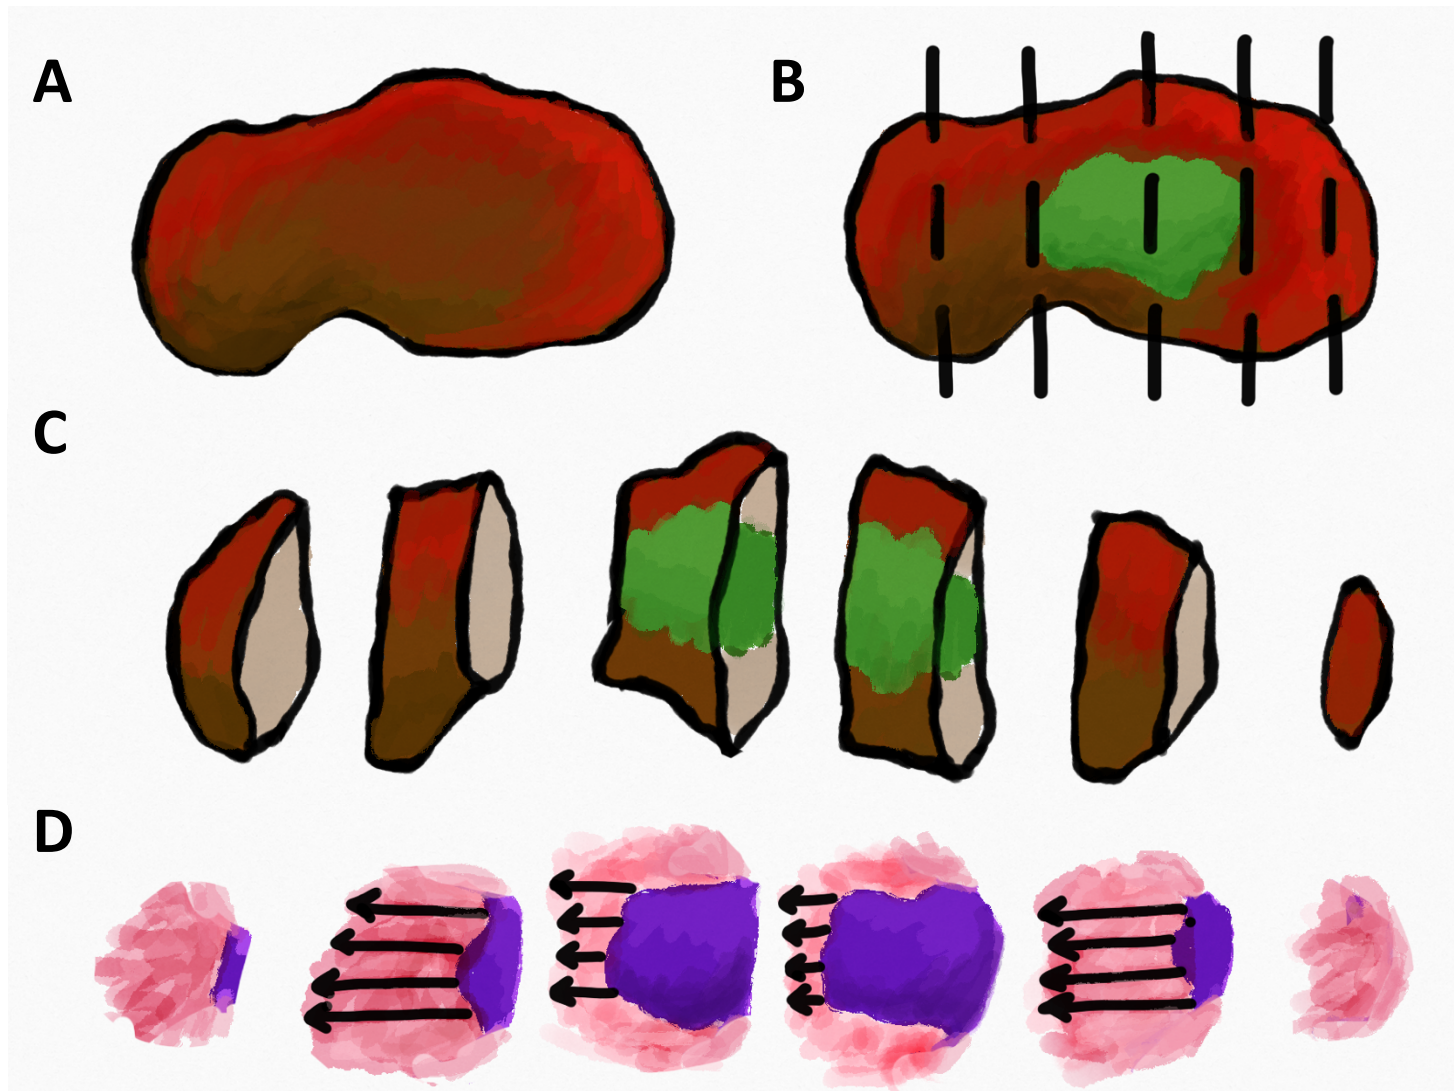

**Supplementary Figure 2:** Flow diagram of tumor-mapping analysis. The primary tumor specimen (A) is imaged using a closed-field fluorescence imaging device (B) and sectioned into breadloafs (C). H&E slides with areas of tumor tissue marked by a board-certified pathologist are analyzed, and tumor tissue distance to the deep margin surface is measured. Tumor depth in areas with fluorescence are compared to tumor depth in areas without fluorescence.

|             | Cohort 2A | Cohort 2B | Cohort 3 |
|-------------|-----------|-----------|----------|
| Sensitivity | 100%      | 99%       | 95%      |
| Specificity | 61%       | 54%       | 62%      |
| PPV         | 37%       | 14%       | 40%      |
| NPV         | 100%      | 99%       | 98%      |

**Supplementary Table 1:** Sensitivity, specificity, positive predictive value (PPV) and negative predictive value (NPV) of fluorescence signal for areas of the primary tumor specimen with tumor tissue  $\leq 1$  mm from the deep margin surface given by cohort.

|             | Cohort 2A | Cohort 2B | Cohort 3 |
|-------------|-----------|-----------|----------|
| Sensitivity | 94%       | 96%       | 86%      |
| Specificity | 66%       | 58%       | 65%      |
| PPV         | 49%       | 27%       | 50%      |
| NPV         | 97%       | 99%       | 92%      |

**Supplementary Table 2:** Sensitivity, specificity, PPV, and NPV of fluorescence signal for areas of the primary tumor specimen with tumor tissue  $\leq 2$  mm from the deep margin surface given by cohort.
